# Supplementary material for: Computer-Aided Imaging Analysis of Probe-Based Confocal Laser Endomicroscopy With Molecular Labeling and Gene Expression Identifies Markers of Response to Biological Therapy in IBD Patients: The Endo-Omics Study
Source: PubMed Central journal article supplement (PMC10472745; doi:10.1093/ibd/izac233), 2022-11-15
Supplement: izac233_suppl_supplementary_figure_s1.pdf [file izac233_suppl_supplementary_figure_s1.pdf]

**A)**

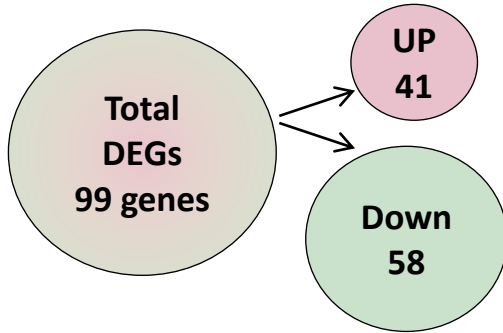

**B)**

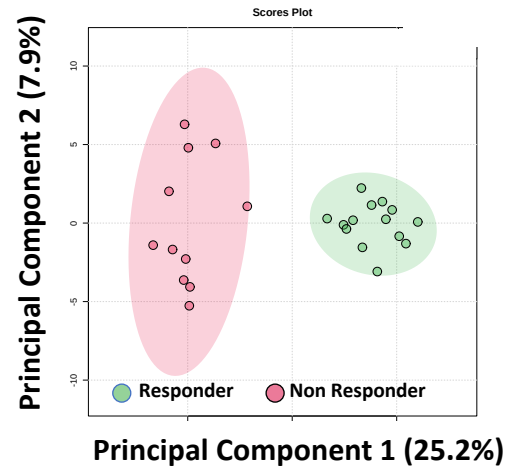

**Supplementary figure 1. A)** Diagrammatic representation of the direction of regulation of the differentially expressed genes (DEGs) when partial responders are considered as non-responders. **B)** Principal component analysis (PCA) score plot performed on the 99 DEGs. Dots represent patients and are coloured according to the subject cohort. Ellipses represent 95% confidence.
