# Supplementary material for: Computer-Aided Imaging Analysis of Probe-Based Confocal Laser Endomicroscopy With Molecular Labeling and Gene Expression Identifies Markers of Response to Biological Therapy in IBD Patients: The Endo-Omics Study
Source: PubMed Central journal article supplement (PMC10472745; doi:10.1093/ibd/izac233), 2022-11-15
Supplement: izac233_suppl_supplementary_figure_s2.pdf [file izac233_suppl_supplementary_figure_s2.pdf]

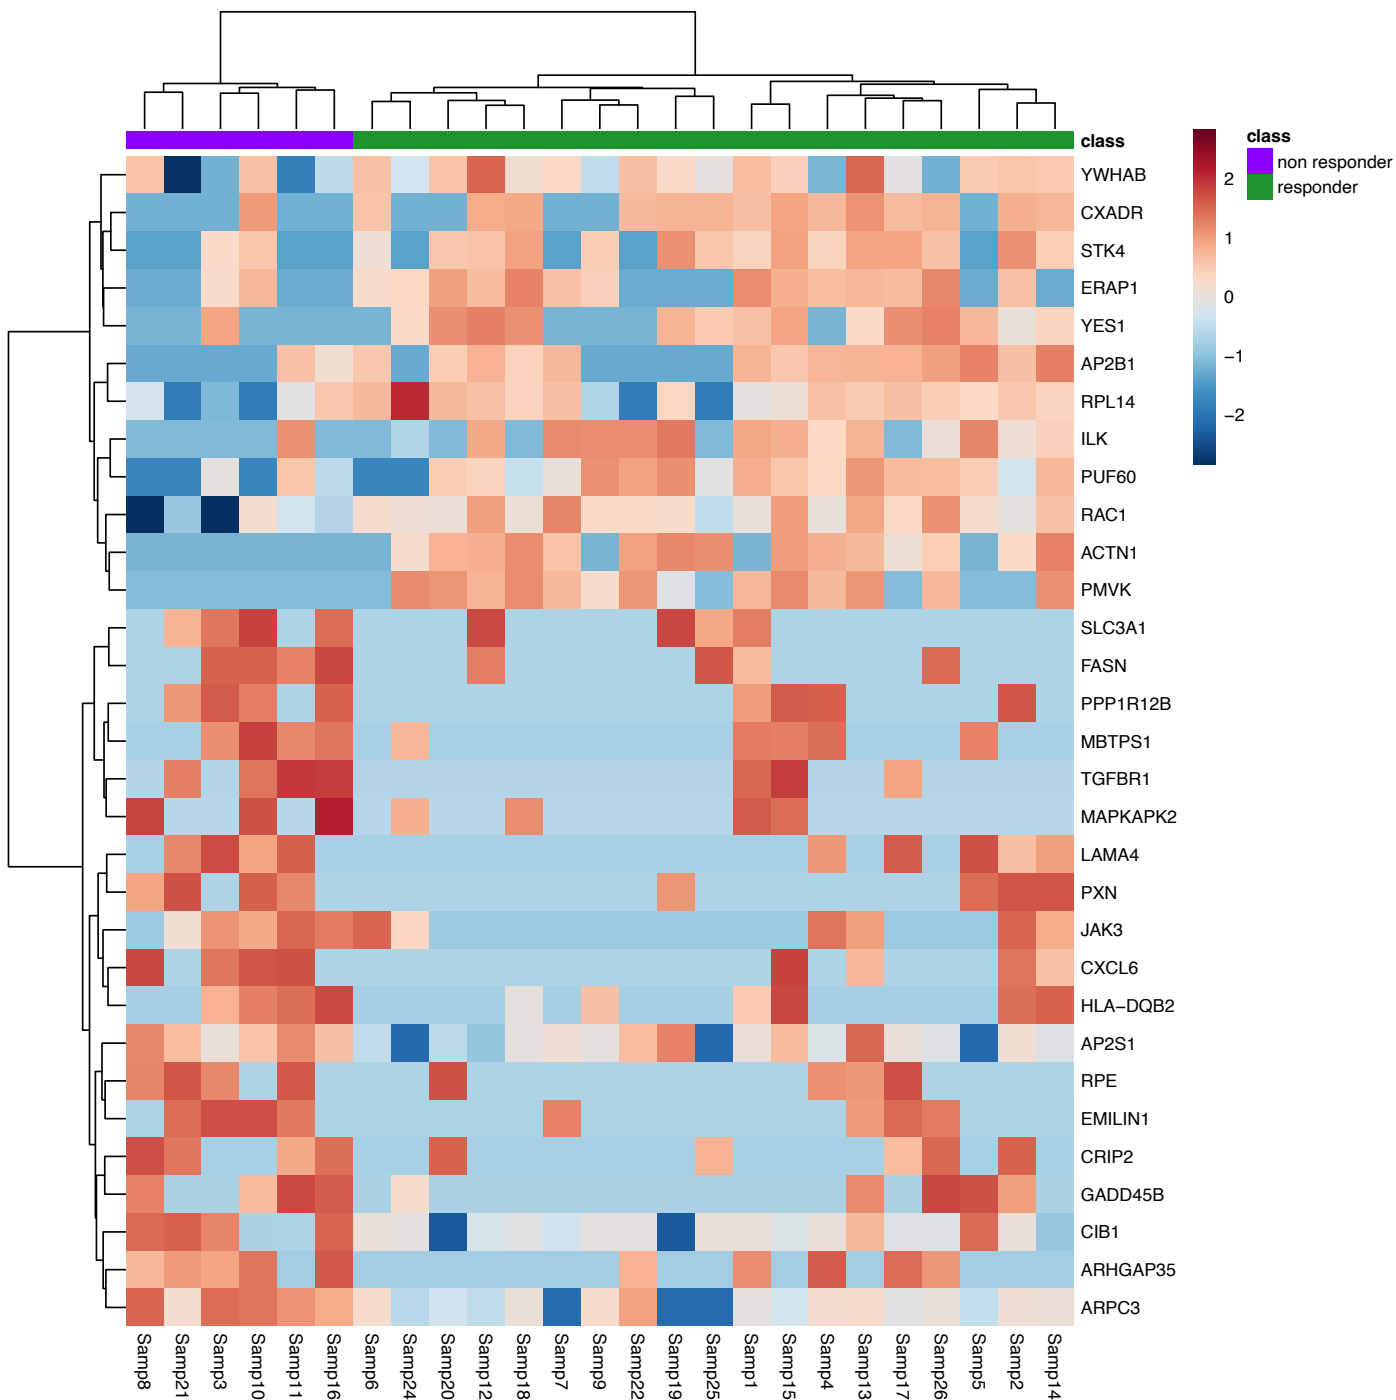

**Supplementary figure 2.** Heat map summary of pathway enriched differentially expressed genes in responders versus non-responders (VIP>1).
